# Supplementary material
Source: PubMed Central journal article supplement (PMC2896784)
Supplement: NIHMS212075-supplement-Supp1.pdf [file NIHMS212075-supplement-Supp1.pdf]

## Supplementary Figures

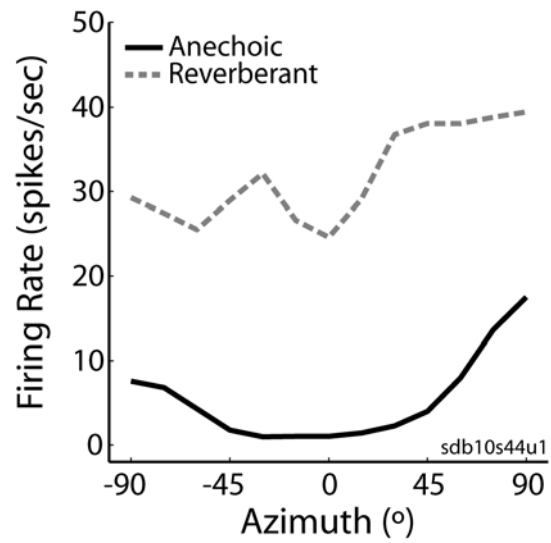

**Supplementary Figure 1.** Example of a high-CF (4900 Hz) ITD<sub>env</sub>-sensitive IC neuron with a misleading relative range.

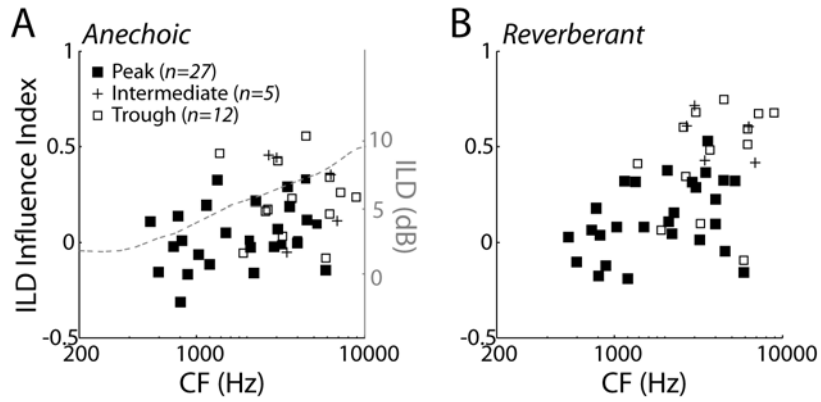

**Supplementary Figure 2.**

ILD influence index as a function of CF obtained using **A**, anechoic and **B**, reverberant ITD+ILD stimuli, with symbols coding the ITD tuning shape groups. At high CFs, the ILD influence index tends to be larger in trough- and intermediate-type neurons than in peak-type neurons, especially in the reverberant condition where the influence of ILD is more pronounced.
